# Supplementary material for: Consecutive living polymerization from cationic to radical: a straightforward yet versatile methodology for the precision synthesis of “cleavable” block copolymers with a hemiacetal ester junction
Source: Royal Society of Chemistry journal article supplement (doi:10.1039/c2py20211e), 2012-01-01
Supplement: c2py20211e.pdf [file c2py20211e.pdf]

**Electronic Supplementary Information (ESI)**

**Consecutive living polymerization from cationic to radical:  
A straightforward yet versatile methodology for the precision  
synthesis of “cleavable” block copolymers with a hemiacetal  
ester junction**

**Makoto Ouchi\*, Akito Konishi, Mikihiro Takenaka, and Mitsuo  
Sawamoto\***

*Department of Polymer Chemistry, Graduate School of Engineering, Kyoto University, Katsura,  
Nishikyo-ku, Kyoto 615-8510, Japan.*

*Tel: +81-75-383-2601; Fax: +81-75-383-2601*

*E-mail: [ouchi@living.polym.kyoto-u.ac.jp](mailto:ouchi@living.polym.kyoto-u.ac.jp),  
[sawamoto@star.polym.kyoto-u.ac.jp](mailto:sawamoto@star.polym.kyoto-u.ac.jp)*

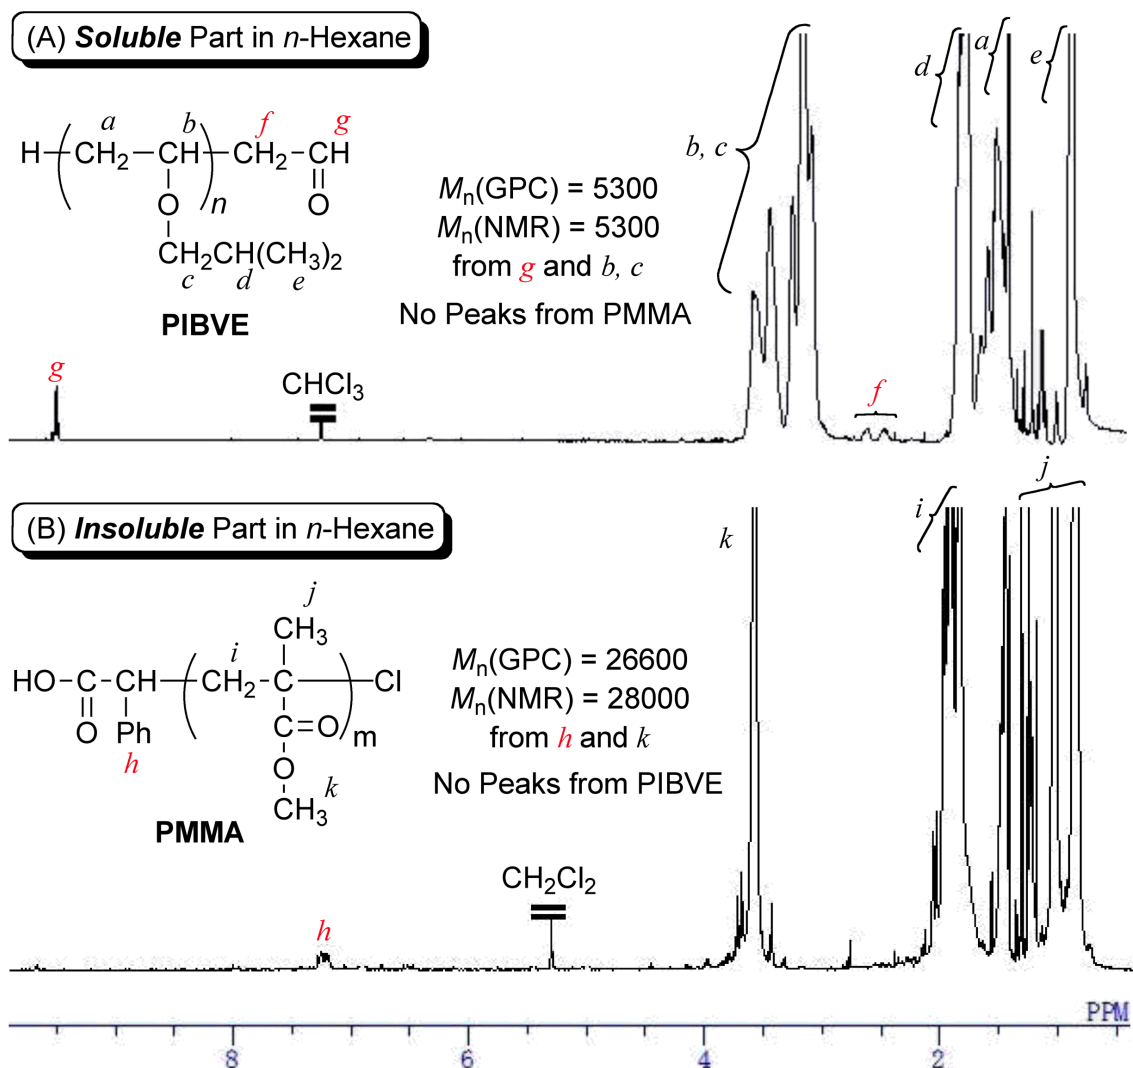

**Figure S1.** Structure analyses by <sup>1</sup>H NMR (500 MHz, CDCl<sub>3</sub>, r.t.) after fractional precipitation with *n*-hexane in a TFA-cleavage experiment on PIBVE-*b*-PMMA carrying an HAE junction: (A) soluble part in *n*-hexane, (B) insoluble part in *n*-hexane.

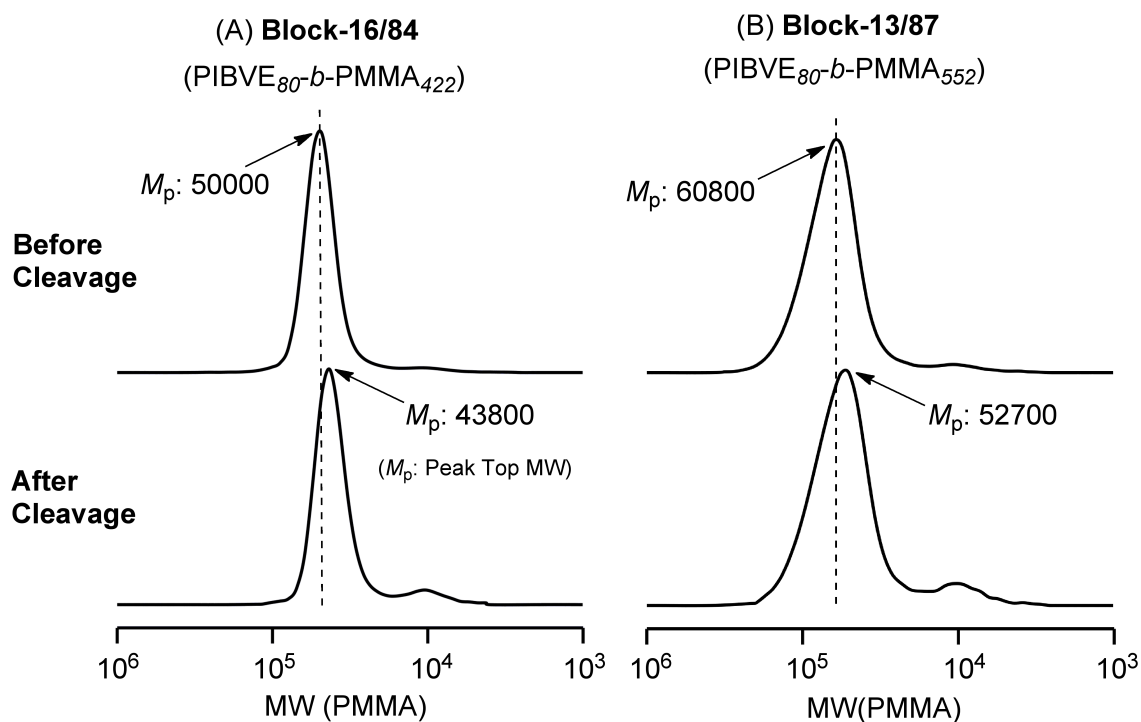

**Figure S2.** SEC analyses for a piece of cast films with HAE-connected PIBVE-*b*-PMMA [Block-16/84 (A) and -13/87 (B)] in cleavage experiments (upperpart: before the cleavage, downpart: after the cleavage). Cleavage treatment: immersion of the cast films in 0.1 vol% TFA solution of *n*-hexane.

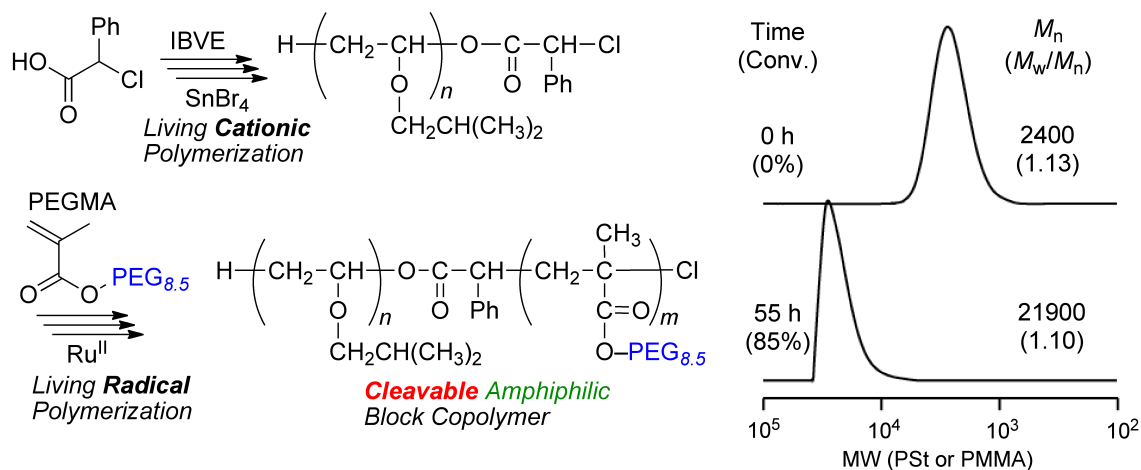

**Figure S3.** Ruthenium-catalyzed living radical polymerization of PEGMA with PIBVE macro initiator in toluene at 80°C: [PEGMA]<sub>0</sub> = 500 mM, [PIBVE]<sub>0</sub> = 5.0 mM, [RuCl(Ind)(PPh<sub>3</sub>)<sub>2</sub>]<sub>0</sub> = 0.5 mM, [*n*-Bu<sub>3</sub>N]<sub>0</sub> = 5.0 mM. The PIBVE macroinitiator was prepared via living cationic polymerization of IBVE with CPAA as an initiator in conjunction with SnBr<sub>4</sub> catalyst.
